# Supplementary material for: A Meta-Analysis of Comparing Intermittent Epidural Boluses and Continuous Epidural Infusion for Labor Analgesia
Source: MDPI journal article supplement (doi:10.3390/ijerph17197082), 2020-09-27
Supplement: s1 [file s1]

**Supplementary Table S1.** Summary of Risk of Bias Assessment and Relevant Characteristics of Eligible Studies.

| Study               | Total Number of Parturients | Parity      | Medication for Epidural                               | The Epidural Maintenance Regimen Used CEI                                          | The Epidural Maintenance Regimen Used IEB                                                                                  | Labor Process, n (%) for Labor Analgesia Mode                       | Quality Assessment |
|---------------------|-----------------------------|-------------|-------------------------------------------------------|------------------------------------------------------------------------------------|----------------------------------------------------------------------------------------------------------------------------|---------------------------------------------------------------------|--------------------|
| Capogna et al. [17] | 145                         | Nulliparous | Levobupivacaine, 0.0625%–0.125%; sufentanil, 0.5µg/mL | 10 mL/h (0.0625%) <i>PLUS</i> PCEA (5 mL bolus, 10minute lockout, 0.125%) (n = 70) | 10 mL (0.0625%) bolus every hour <i>PLUS</i> PCEA (5 mL bolus, 10 minute lockout, 0.125%) (n = 75)                         | Spontaneous labor; oxytocin use not reported                        | Low risk           |
| Chua et al. [18]    | 42                          | Nulliparous | Ropivacaine, 0.1%; fentanyl, 2 µg/mL                  | 5 mL/h (n = 21)                                                                    | 5 mL bolus every hour (n = 21)                                                                                             | Spontaneous labor; preanalgesia oxytocin; CEI, 8 (38); IEB, 9 (43)  | Low risk           |
| Fettes et al. [19]  | 40                          | Nulliparous | Ropivacaine, 0.2%; fentanyl, 2 µg/mL                  | 10 mL/h (n = 20)                                                                   | 10 mL bolus every hour (n = 20)                                                                                            | Labor induction; CEI, 12 (60); IEB, 14 (70)                         | Low risk           |
| Leo et al. [20]     | 62                          | Nulliparous | Ropivacaine 0.1%; fentanyl 2 µcg/mL                   | 5 mL/h <i>PLUS</i> PCEA (5 mL bolus, 10 minute lockout) (n = 31)                   | 5 mL bolus every hour (or 30 minutes after successful PCEA dose) <i>PLUS</i> PCEA (5 mL bolus, 10 minute lockout) (n = 31) | Preanalgesia oxytocin; CEI, 10 (32); IEB, 15 (48)                   | Low risk           |
| Lim et al. [21]     | 60                          | Nulliparous | Levobupivacaine, 0.1%; fentanyl, 2 µg/mL              | 10 mL/h (n = 30)                                                                   | 5 mL bolus every 30 minutes (n = 30)                                                                                       | Preanalgesia oxytocin; CEI, 4 (13); IEB, 9 (30)                     | Low risk           |
| Lim et al. [22]     | 50                          | Nulliparous | Ropivacaine, 0.1%; fentanyl, 2 µg/mL                  | 10 mL/h (n = 25)                                                                   | 2.5 mL bolus every 15 minutes (initiated 7.5 minutes after dosage of subarachnoid) (n = 25)                                | Spontaneous labor; preanalgesia oxytocin; CEI, 10 (40); IEB, 5 (20) | Low risk           |
| Salim et al. [23]   | 127                         | Nulliparous | Bupivacaine, 0.125%–0.25%; fentanyl, 2 µg/mL          | 8 mL/h (0.125%) <i>PLUS</i> PCEA (3 mL bolus, 20 minute lockout) (n = 63)          | 10 mL bolus every hour (0.25%) (n = 64)                                                                                    | Labor induction; CEI, 17 (27); IEB, 14 (22)                         | Low risk           |
| Sia et al. [24]     | 42                          | Nulliparous | Ropivacaine, 0.1%; fentanyl, 2 µg/mL                  | 5 mL/h <i>PLUS</i> PCEA (5 mL bolus, 10 minute lockout) (n = 21)                   | 5mL bolus every hour (or 1 hour after successful dosage of PCEA) (n = 21)                                                  | Spontaneous labor; preanalgesia oxytocin; CEI, 5 (24); IEB, 7 (33)  | Low risk           |
| Wong et al. [25]    | 126                         | Parous      | Bupivacaine, 0.625%; fentanyl 2, µg/mL                | 12 mL/h <i>PLUS</i> PCEA (5 mL bolus, 10 minute lockout) (n = 63)                  | 6 mL bolus every 30 minutes <i>PLUS</i> PCEA (5 mL bolus, 10 minute lockout) (n = 63)                                      | Labor induction; CEI, 63 (100); IEB; 63 (100)                       | Low risk           |

|                  |     |                     |                                         |                                                                          |                                                                                                                                  |                                                                    |          |
|------------------|-----|---------------------|-----------------------------------------|--------------------------------------------------------------------------|----------------------------------------------------------------------------------------------------------------------------------|--------------------------------------------------------------------|----------|
| Wang et al. [26] | 186 | Nulliparous         | Bupivacaine, 0.08%; fentanyl, 0.4 µg/ml | 10ml/60min <i>PLUS</i> PCEA (5 ml bolus, 30 minute lockout) (n = 62)     | 5ml/30min <i>PLUS</i> PCEA (5 ml bolus, 30 minute lockout) (n = 62)                                                              | Preanalgesia oxytocin; Labor induction; CEI, 18 (29); IEB; 12 (19) | Low risk |
| Ojo et al. [27]  | 120 | Nulliparous /Parous | 0.1% ropivacaine with 2 µg/mL fentanyl  | 8 mL/h <i>PLUS</i> PCEA (8 mL boluses with a 10-minute lockout) (n = 59) | 6-mL programmed intermittent epidural boluses every 45 minutes <i>PLUS</i> PCEA (8 mL boluses with a 10-minute lockout) (n = 61) | Preanalgesia oxytocin; Labor induction; CEI, 44 (75); IEB; 46 (75) | Low risk |

**Supplementary Table S2.** Quality Assessment Results of Eligible Studies.

| Questions                                                                   | Capogna et al. [17] | Chua et al. [18] | Fettes et al. [19] | Leo et al. [20] | Lim et al. [21] | Lim et al. [22] | Salim et al. [23] | Sia et al. [24] | Wong et al. [25] | Wang et al. [26] | Ojo et al. [27] |
|-----------------------------------------------------------------------------|---------------------|------------------|--------------------|-----------------|-----------------|-----------------|-------------------|-----------------|------------------|------------------|-----------------|
| Was the method of randomization adequate?                                   | Positive            | Negative         | Positive           | Negative        | Negative        | Positive        | Positive          | Positive        | Positive         | Positive         | Positive        |
| Was the treatment allocation concealed?                                     | Positive            | Positive         | Positive           | Positive        | Negative        | Positive        | Positive          | Positive        | Positive         | Positive         | Positive        |
| Was the patient blinded to the intervention?                                | Positive            | Positive         | Positive           | Positive        | Negative        | Positive        | Inconclusive      | Positive        | Positive         | Inconclusive     | Positive        |
| Was the care provider blinded to the intervention?                          | Positive            | Positive         | Positive           | Positive        | Inconclusive    | Positive        | Inconclusive      | Positive        | Positive         | Inconclusive     | Positive        |
| Was the outcome assessor blinded to the intervention?                       | Positive            | Positive         | Positive           | Positive        | Positive        | Positive        | Inconclusive      | Positive        | Positive         | Inconclusive     | Positive        |
| Was the dropout rate described and acceptable?                              | Positive            | Positive         | Positive           | Positive        | Positive        | Positive        | Positive          | Positive        | Positive         | Negative         | Positive        |
| Were all randomized participants analyzed in their allocated group?         | Positive            | Positive         | Positive           | Positive        | Positive        | Positive        | Positive          | Positive        | Positive         | Positive         | Positive        |
| Are reports of the study free of suggestion of selective outcome reporting? | Positive            | Positive         | Positive           | Positive        | Positive        | Positive        | Negative          | Positive        | Positive         | Positive         | Positive        |
| Were the groups similar at baseline?                                        | Positive            | Positive         | Positive           | Positive        | Positive        | Positive        | Positive          | Positive        | Positive         | Positive         | Positive        |
| Were cointerventions avoided or similar?                                    | Positive            | Positive         | Positive           | Positive        | Positive        | Positive        | Positive          | Positive        | Positive         | Positive         | Positive        |
| Was the compliance acceptable in all groups?                                | Positive            | Positive         | Negative           | Positive        | Positive        | Positive        | Positive          | Positive        | Positive         | Positive         | Positive        |
| Was the timing of the outcome assessment similar?                           | Positive            | Positive         | Positive           | Positive        | Positive        | Positive        | Positive          | Positive        | Positive         | Positive         | Positive        |
